# Supplementary material for: High-affinity mirror-image monobody targeting MCP-1 generated via TRAP display and chemical protein synthesis
Source: Research Square preprint supplement (doi:10.21203/rs.3.rs-4275898/v1), 2024-04-25
Supplement: Supplementary file 1 [file a12cf680c7cf44f941bb47d5.xlsx]

## Sheet: Data S1
Data file S1. Nucleic acid sequences.	Abbreviations: SPC18, spacer 18; -NH2, Amino(C12) modification; Pu, puromycin; HEX, hexachloro-fluorescein, Cy3, Cyanine3; 6FAM, 6-carboxyfluorescein; TAMRA, 6-carboxytetramethylrhodamine. code letters represent "mixed bases" K= G/ T; M= A/ C; R= A/ G; S= G/ C; W= A/ T; Y= T/ C; D= A/ T/ G; H= A/ T/ C; N= A/ T/ G/ C
Names	Oligonucleotide sequences (5' to 3')	Additional information
T7SD8M2.F44	ATACTAATACGACTCACTATAGGATTAAGGAGGTGATATTTATG	General primer
G5S-4Gan21-3.R42	CCCGCCTCgCGCCCgCCGTCCcTAGCTACCTCCTCCTCCACC	General primer
FN3S.R29	TAGCTACCTCCTCCTCCACCCGTGCGGTA	Reverse transcription
FN3L1p.R20	CCAAGAAATCTGAATGCTCG	Real-time PCR
Hex-mPuL	CCCGCCUCGCGCCCGCCGUCC (SPC18) 5 CC (Pu)	5'-HEX and OMe-modification (CCCGCCUCGCGCCCGCCGUCC)
Q107delMonoS-ex.F71	ACACTAGTGGcactGGATCCCTGGAAGTTGTGGAAGCCAGCCCGACGAGCATTCAGATTTCTTGGGACGCT	Cloning from original selection
Q107.F40	ATCTCATCACCATCACCATCACACTAGTGGCACTGGATCC	Cloning from original selection
Q106.R40	CTGGATCTATCAACAGGAGTCCAAGCTCAGCTAATTAAGC	Cloning from original selection
Q107-MonoS-EIDKPSQ.R67	CTGGATCTATCAACAGGAGTCCAAGCTCAGCTAATTAAGCTTAttgACTtggtttgtcaatttcCGT	Cloning from original selection
DMCP1FN3-1.F45	GAGCATTCAGATTTCTTGGGACGCTGTTTACTCTTACACTTACGA	Cloning for Mb1 from original selection
DMCP1FN3-2.F45	GAGCATTCAGATTTCTTGGGACGCTAACGTTTACTACATCATGTG	Cloning for Mb2 from original selection
DMCP1FN3-4.F45	GAGCATTCAGATTTCTTGGGACGCTTCTTACTCTCTGCTGTACTA	Cloning for Mb3 from original selection
DMCP1FN3-5.F45	GAGCATTCAGATTTCTTGGGACGCTGCTTACTACCTGATCAAAGG	Cloning for Mb4from original selection
DMCP1FN3-6.F45	GAGCATTCAGATTTCTTGGGACGCTCTGTGGGACTACTACGACGG	Cloning for Mb5 from original selection
DMCP1FN3-14.F45	GAGCATTCAGATTTCTTGGGACGCTACTTACTGGGCTCTGCAGCG	Cloning for Mb6 from original selection
DMCP1FN3-16.F45	GAGCATTCAGATTTCTTGGGACGCTGGTACTGACTGGTACTACGG	Cloning for Mb7 from original selection
DMCP1FN3-17.F45	GAGCATTCAGATTTCTTGGGACGCTTACTCTAAATCTTACATCTG	Cloning for Mb8 from original selection
DMCP1FN3-1.R45	TCGTGCGGTAGTTGATAGAAATCGGGTAGAAACCCCAACCCATGT	Cloning for Mb1 from original selection
DMCP1FN3-2.R45	TCGTGCGGTAGTTGATAGAAATCGGCTGACGGTAGTAGTAACCAC	Cloning for Mb2 from original selection
DMCP1FN3-4.R45	TCGTGCGGTAGTTGATAGAAATCGGCAGGAAAGACCAACCCCAAC	Cloning for Mb3 from original selection
DMCP1FN3-5.R45	TCGTGCGGTAGTTGATAGAAATCGGGTAAGTGTCCCAACCAACAG	Cloning for Mb4from original selection
DMCP1FN3-6.R45	TCGTGCGGTAGTTGATAGAAATCGGACCAGATTCACCGTAACCGT	Cloning for Mb5 from original selection
DMCP1FN3-14.R45	TCGTGCGGTAGTTGATAGAAATCGGAGTGAAAGCCCAACCGATGT	Cloning for Mb6 from original selection
DMCP1FN3-16.R45	TCGTGCGGTAGTTGATAGAAATCGGCTGAACGTCCAGCCAAGAAA	Cloning for Mb7 from original selection
DMCP1FN3-17.R45	TCGTGCGGTAGTTGATAGAAATCGGACCGATATGTTCCCAACCAG	Cloning for Mb8 from original selection
BCloop_FN3.F22	GTTCGCTACTATCGCATTACCT	DNA template preparation for affinity maturation
EIDKPSQ-G5S.R42	CTAGCTACCTCCTCCTCCACCTTGACTTGGTTTGTCAATTTC	DNA template preparation for affinity maturation
T7SD8M2-MQANSGS-FN3.F66	CTATAGGATTAAGGAGGTGATATTTATGCAAGCCAATTCTGGTTCTCTGGAAGTTGTGGAAGCCAG	DNA template preparation for affinity maturation
FN3_FGloop.R22	GGTAACTGCGTACACCGTGATG	DNA template preparation for affinity maturation
D6-BCL6.F74	TTCAGATTTCTTGGGACGCTNNKNNKNNKNNKNNKNNKGGATGGACATGGAAAGTTCGCTACTATCGCATTACC	DNA template preparation for affinity maturation
D6-BCR6.F74	TTCAGATTTCTTGGGACGCTCTCTGGGACTACTACNNKNNKNNKNNKNNKNNKGTTCGCTACTATCGCATTACC	DNA template preparation for affinity maturation
D6-FGL6.R74	GCGGTAGTTGATAGAAATCGGTCCTGATTCTCCGTAMNNMNNMNNMNNMNNMNNGGTAACTGCGTACACCGTGA	DNA template preparation for affinity maturation
D6-FGR6.R74	GCGGTAGTTGATAGAAATCGGMNNMNNMNNMNNMNNMNNGTATACTCCGTAGTAGGTAACTGCGTACACCGTGA	DNA template preparation for affinity maturation
FN3_BCloop.F51	CTGGAAGTTGTGGAAGCCAGCCCGACGAGCATTCAGATTTCTTGGGACGCT	DNA template preparation for affinity maturation
FGloop_FN3-EIDKPSQ-G5S.R66	CTAGCTACCTCCTCCTCCACCTTGACTTGGTTTGTCAATTTCCGTGCGGTAGTTGATAGAAATCGG	DNA template preparation for affinity maturation
DMCP1-D6-am2.F70	AGATTTCTTGGGACGCTCTCTGGGACTACTACAATGGGTTTACGCATCCTGTTCGCTACTATCGCATTAC	Cloning from affinity maturation selection
DMCP1-D6-am2-ex.F70	CAATTCTGGTTCTCTGGAAGTTGTGGAAGCCAGCCCGACGAGCATTCAGATTTCTTGGGACGCTCTCTGG	Cloning from affinity maturation selection
DMCP1-D6-am3_.R70	TAGTTGATAGAAATCGGTCCTGATTCTCCGTAACCATAATTAGGATACCAGGTAACTGCGTACACCGTGA	Cloning from affinity maturation selection
DMCP1-D6-am3_ex.R52	TTGACTTGGTTTGTCAATTTCCGTGCGGTAGTTGATAGAAATCGGTCCTGAT	Cloning from affinity maturation selection
DMCP1-ex.F50	CACCATCACACTAGTGGcactGGATCCATGCAAGCCAATTCTGGTTCTCT	Cloning from affinity maturation selection
DMCP1-ex.R48	GAGTCCAAGCTCAGCTAATTAAGCTTATTGACTTGGTTTGTCAATTTC	Cloning from affinity maturation selection
MonoS-MCP1-D6-1am1.F70	ATTTCTTGGGACGCTTTTCATCGGTATCATAATGGATGGACATGGAAAGTTCGCTACTATCGCATTACCT	Cloning from affinity maturation selection
MonoS-MCP1-D6-1am1ex.F70	CAATTCTGGTTCTCTGGAAGTTGTGGAAGCCAGCCCGACGAGCATTCAGATTTCTTGGGACGCTTTTCAT	Cloning from affinity maturation selection
MonoS-MCP1-D6-1am1.R70	GTTGATAGAAATCGGACCAGATTCACCGTAACCGTAAACACCGTAGTAGGTAACTGCGTACACCGTGATG	Cloning from affinity maturation selection
MonoS-MCP1-D6-1am1ex.R55	TGACTTGGTTTGTCAATTTCCGTGCGGTAGTTGATAGAAATCGGACCAGATTCAC	Cloning from affinity maturation selection
MonoS-MCP1-am-EX.F55	CACCATCACACTAGTGGcactGGATCCATGCAAGCCAATTCTGGTTCTCTGGAAG	Cloning from affinity maturation selection
MonoS-MCP1-D6-2am2.F70	ATTTCTTGGGACGCTCTCTGGGACTACTACAATTCTTGGACGCATCCGGTTCGCTACTATCGCATTACCT	Cloning from affinity maturation selection
MonoS-MCP1-D6-2am2ex.F70	CAATTCTGGTTCTCTGGAAGTTGTGGAAGCCAGCCCGACGAGCATTCAGATTTCTTGGGACGCTCTCTG	Cloning from affinity maturation selection
MonoS-MCP1-D6-3am2.F70	ATTTCTTGGGACGCTCTGTGGGACTACTACGACGGTTGGACTTGGAAAGTTCGCTACTATCGCATTACCT	Cloning from affinity maturation selection
MonoS-MCP1-D6-3am2ex.F70	CAATTCTGGTTCTCTGGAAGTTGTGGAAGCCAGCCCGACGAGCATTCAGATTTCTTGGGACGCTCTGTGG	Cloning from affinity maturation selection
MonoS-MCP1-D6-3am2.R70	GTTGATAGAAATCGGTCCTGATTCTCCGTAACCATAACGCGGATACCAGGTAACTGCGTACACCGTGATG	Cloning from affinity maturation selection
MonoS-MCP1-D6-3am2ex.R49	TGACTTGGTTTGTCAATTTCCGTGCGGTAGTTGATAGAAATCGGTCCTG	Cloning from affinity maturation selection
MonoS-MCP1-D6am12.F70	ATTTCTTGGGACGCTTTTCATCGGTATCATAATGGGTTTACGCATCCTGTTCGCTACTATCGCATTACCT	Cloning from affinity maturation selection
MonoS-MCP1-D6-1am2.F70	ATTTCTTGGGACGCTTTTCATGCTTATCATAATGGATGGACATGGAAAGTTCGCTACTATCGCATTACCT	Cloning from affinity maturation selection
MonoS-MCP1-D6-1-1&6-2-2.F70	ATTTCTTGGGACGCTTTTCATCGGTATCATAATTCTTGGACGCATCCGGTTCGCTACTATCGCATTACCT	Cloning from affinity maturation selection
Template I	GTTCGCTACTATCGCATTACCTATGGCGAAACCGGCGGTAACAGTCCGGTCCAGGAATTTACGGTGCCGGGTTCAAAATCGACCGCGACGATTTCCGGCCTGAAACCGGGTGTTGATTATACCATCACGGTGTACGCAGTTACC	Cloning from affinity maturation selection; prepared in a previous paper
